# Supplementary material
Source: PubMed Central journal article supplement (PMC6938560)

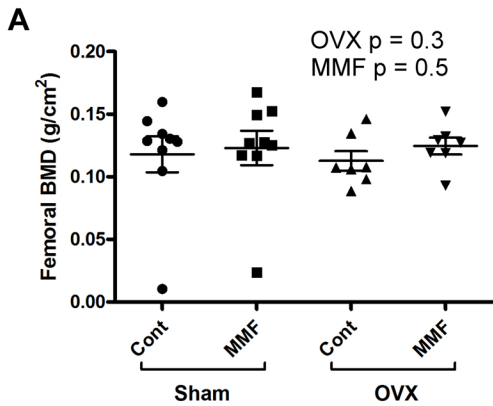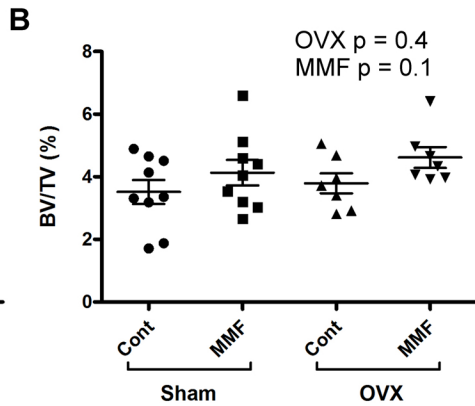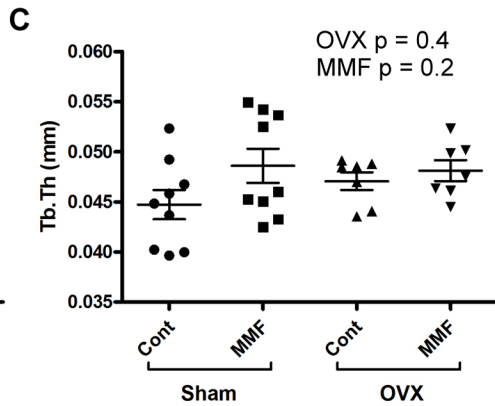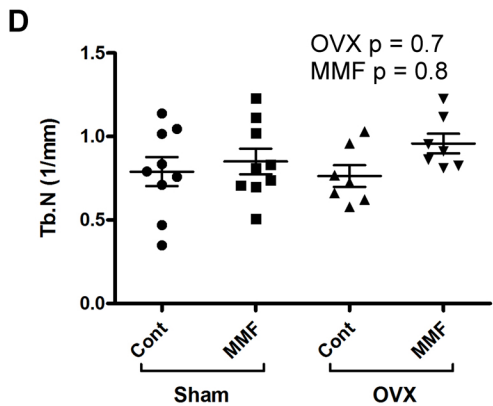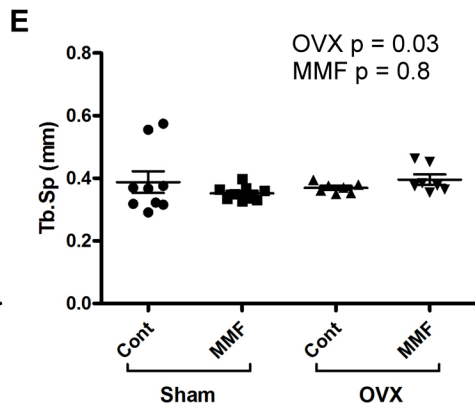

Supplement: NIHMS1537243-supplement-02.pdf [file NIHMS1537243-supplement-02.pdf]

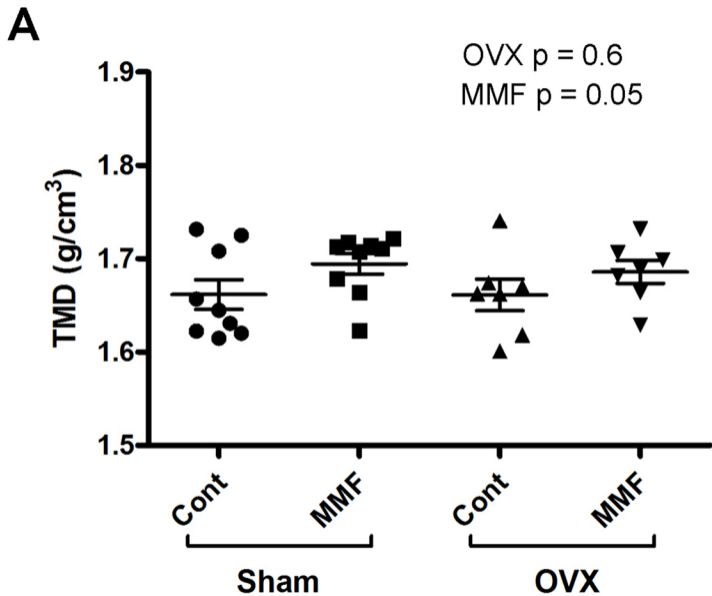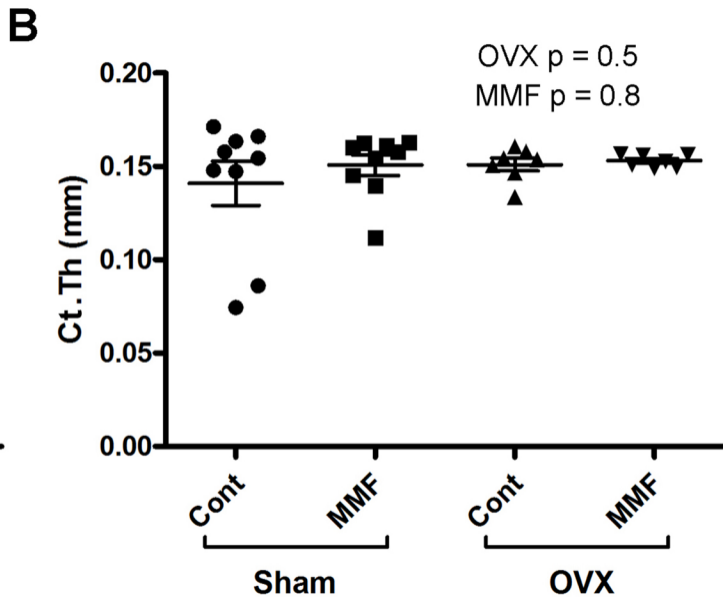

Supplement: NIHMS1537243-supplement-03.pdf [file NIHMS1537243-supplement-03.pdf]
